# Supplementary material for: Evaluation of the Recipe Function in Popular Dietary Smartphone Applications, with Emphasize on Features Relevant for Nutrition Assessment in Large-Scale Studies
Source: MDPI journal article supplement (doi:10.3390/nu11010200), 2019-01-19
Supplement: s1 [file s1]

**Table S1: Energy and macronutrient differences between app and NEVO for stampot**

|                      | Fat (g) | Protein (g) | Carbohydrate (g) | Energy (kcal) | Energy difference with reference | Fat difference with reference | Protein difference with reference | Carbohydrate difference with reference |
|----------------------|---------|-------------|------------------|---------------|----------------------------------|-------------------------------|-----------------------------------|----------------------------------------|
| Reference raw        | 10.9    | 16.95       | 70.375           | 472.25        | 0                                | 0                             | 0                                 | 0                                      |
| Myfitnesspal         | 10.7    | 17          | 70.3             | 476           | 3.75                             | -0.2                          | 0.05                              | -0.075                                 |
| Fatsecret            | 5.78    | 17.39       | 70.66            | 430           | -42.25                           | -5.12                         | 0.44                              | 0.285                                  |
| YAZIO                | 10.5    | 17.7        | 82.2             | 482           | 9.75                             | -0.4                          | 0.75                              | 11.825                                 |
| Lose it!             | 7.2     | 17.8        | 71.6             | 456           | -16.25                           | -3.7                          | 0.85                              | 1.225                                  |
| Lifesum              | 9.9     | 11.8        | 67.5             | 403           | -69.25                           | -1                            | -5.15                             | -2.875                                 |
| MyPlate              | 10.33   | 15.26       | 80.53            | 444           | -28.25                           | -0.57                         | -1.69                             | 10.155                                 |
| MyNetDiet            | 10.75   | 16.75       | 55.25            | 419           | -53.25                           | -0.15                         | -0.2                              | -15.125                                |
| Calories!            | 10      | 11.7        | 56.3             | 379.6         | -92.65                           | -0.9                          | -5.25                             | -14.075                                |
| The Secret of Weight |         | -           | -                | 356.25        | -116                             | -                             | -                                 | -                                      |
| Virtuagym Food       | 11.8    | 15.03       | 59.02            | 410           | -62.25                           | 0.9                           | -1.92                             | -11.355                                |
| Nutracheck           | 17.5    | 5.9         | 61.4             | 531           | 58.75                            | 6.6                           | -11.05                            | -8.975                                 |
| HI                   | 8       | 0           | 64.3             | 428.1         | -44.15                           | -2.9                          | -16.95                            | -6.075                                 |

**Table S2: Energy and macronutrient differences between app and NEVO for pizza salami, tomato, mushroom**

|                      | Fat (g) | Protein (g) | Carbohydrate (g) | Energy (kcal) | Energy difference with reference | Fat difference with reference | Protein difference with reference | Carbohydrate difference with reference |
|----------------------|---------|-------------|------------------|---------------|----------------------------------|-------------------------------|-----------------------------------|----------------------------------------|
| Reference raw        | 25.925  | 22.075      | 38.8             | 482.75        | 0                                | 0                             | 0                                 | 0                                      |
| Myfitnesspal         | 23.3    | 19.8        | 38.9             | 447           | -35.75                           | -2.625                        | -2.275                            | 0.1                                    |
| Fatsecret            | 25.64   | 20.87       | 39.41            | 478           | -4.75                            | -0.285                        | -1.205                            | 0.61                                   |
| YAZIO                | 26.2    | 21.9        | 39.1             | 481           | -1.75                            | 0.275                         | -0.175                            | 0.3                                    |
| Lose it!             | 23      | 19.4        | 40.7             | 440.4         | -42.35                           | -2.925                        | -2.675                            | 1.9                                    |
| Lifesum              | 25.6    | 21.3        | 40.7             | 478           | -4.75                            | -0.325                        | -0.775                            | 1.9                                    |
| MyPlate              | 21.48   | 19.49       | 50.63            | 448           | -34.75                           | -4.445                        | -2.585                            | 11.83                                  |
| MyNetDiet            | 25.25   | 17          | 38               | 482.75        | 0                                | -0.675                        | -5.075                            | -0.8                                   |
| Calories!            | 24.3    | 21.1        | 36               | 459.2         | -23.55                           | -1.625                        | -0.975                            | -2.8                                   |
| The Secret of Weight | -       | -           | -                | 476           | -6.75                            | -                             | -                                 | -                                      |
| Virtuagym Food       | 25.85   | 21.13       | 38.42            | 475           | -7.75                            | -0.075                        | -0.945                            | -0.38                                  |
| Nutracheck           | 20.5    | 19.5        | 43               | 436           | -46.75                           | -5.425                        | -2.575                            | 4.2                                    |
| HI                   | 23      | 18.3        | 36               | 442.1         | -40.65                           | -2.925                        | -3.775                            | -2.8                                   |

**Table S3: Energy and macronutrient differences between app and NEVO for hachee**

|                      | Fat (g) | Protein (g) | Carbohydrate (g) | Energy (kcal) | Energy difference with reference | Fat difference with reference | Protein difference with reference | Carbohydrate difference with reference |
|----------------------|---------|-------------|------------------|---------------|----------------------------------|-------------------------------|-----------------------------------|----------------------------------------|
| Reference raw        | 17.85   | 23.325      | 13.7             | 315.5         | 0                                | 0                             | 0                                 | 0                                      |
| Myfitnesspal         | 20      | 22.4        | 15.4             | 330           | 14.5                             | 2.15                          | -0.925                            | 1.7                                    |
| Fatsecret            | 13.59   | 22.7        | 17.51            | 273           | -42.5                            | -4.26                         | -0.625                            | 3.81                                   |
| YAZIO                | 13.4    | 22.3        | 17.4             | 269           | -46.5                            | -4.45                         | -1.025                            | 3.7                                    |
| Lose it!             | 9.1     | 12.1        | 17.5             | 197           | -118.5                           | -8.75                         | -11.225                           | 3.8                                    |
| Lifesum              | 20.3    | 22.5        | 12.8             | 322           | 6.5                              | 2.45                          | -0.825                            | -0.9                                   |
| MyPlate              | 19.51   | 2.05        | 15.95            | 327           | 11.5                             | 1.66                          | -21.275                           | 2.25                                   |
| MyNetDairy           | 26.25   | 22          | 9                | 390.25        | 74.75                            | 8.4                           | -1.325                            | -4.7                                   |
| Calories!            | 17.6    | 35.8        | 9.6              | 347.5         | 32                               | -0.25                         | 12.475                            | -4.1                                   |
| The Secret of Weight | -       | -           | -                | 373           | 57.5                             | -                             | -                                 | -                                      |
| Virtuagym Food       | 12.72   | 24.59       | 13.17            | 270           | -45.5                            | -5.13                         | 1.265                             | -0.53                                  |
| Nutracheck           | 28.6    | 32.3        | 16.8             | 457           | 141.5                            | 10.75                         | 8.975                             | 3.1                                    |
| HI                   | 20.2    | 23.2        | 12               | 334.4         | 18.9                             | 2.35                          | -0.125                            | -1.7                                   |
