# Supplementary material for: Evaluation of the Recipe Function in Popular Dietary Smartphone Applications, with Emphasize on Features Relevant for Nutrition Assessment in Large-Scale Studies
Source: MDPI journal article supplement (doi:10.3390/nu11010200), 2019-01-19
Supplement: s1 [file s1]

Table S4. Calcium calculation for three recipes

| stamp<br>ot |                          | Raw<br>weight in<br>recipe (g) | Ca mg in<br>recipe(NEV<br>O) | Ca mg in<br>recipe<br>(Mynetdiar<br>y) | Ca mg in<br>recipe<br>(Calories!) | Ca mg in<br>recipe(Virt<br>ue) | First and<br>second<br>cooking<br>procedure | First and<br>second<br>retention<br>factor | Ca mg in<br>one<br>portion<br>(NEVO) |
|-------------|--------------------------|--------------------------------|------------------------------|----------------------------------------|-----------------------------------|--------------------------------|---------------------------------------------|--------------------------------------------|--------------------------------------|
|             | kale                     | 250.00                         | 450.00                       | 377.50                                 | 530.00                            | 337.50                         | stew                                        | 1.00                                       | 450.00                               |
|             | potatoes                 | 312.50                         | 18.75                        | 28.13                                  | 18.75                             | 28.13                          | stew                                        | 1.00                                       | 18.75                                |
|             | butter                   | 10.00                          | 1.70                         | 2.40                                   | 1.30                              | 2.40                           | boil                                        | 1.00                                       | 1.70                                 |
|             | semi-<br>skimmed<br>milk | 18.80                          | 23.12                        | 22.94                                  | 23.12                             | 23.31                          | boil                                        | 1.00                                       | 23.12                                |
|             | Total                    |                                | 493.57                       | 430.96                                 | 573.17                            | 391.34                         |                                             |                                            | 493.57                               |
| Pizza       | Flour                    | 50.00                          | 7.50                         | 7.50                                   | 7.80                              | 7.50                           | bake in<br>oven                             | 1.00                                       | 7.50                                 |
|             | Olive oil                | 4.50                           | 0.00                         | 0.05                                   | 0.04                              | 0.05                           | bake in<br>oven                             | 1.00                                       | 0.00                                 |
|             | Tomato<br>puree          | 11.25                          | 5.51                         | 2.03                                   | 4.95                              | 2.03                           | bake in<br>oven                             | 1.00                                       | 5.51                                 |
|             | Yeast                    | 0.88                           | 0.70                         | 0.26                                   | 0.24                              | 0.26                           | bake in<br>oven                             | -                                          | 0.70                                 |
|             | Oregano                  | 0.38                           | 5.91                         | 5.99                                   | 0.00                              | 5.99                           | bake in<br>oven                             | -                                          | 5.91                                 |
|             | Mature<br>cheese 48+     | 37.50                          | 306.00                       | 270.38                                 | 270.00                            | 270.38                         | bake in<br>oven                             | 1.00                                       | 306.00                               |
|             | Tomato                   | 25.00                          | 2.75                         | 2.50                                   | 2.50                              | 2.50                           | bake in<br>oven                             | 1.00                                       | 2.75                                 |
|             | Salami                   | 25.00                          | 8.75                         | 3.25                                   | 4.00                              | 3.25                           | bake in<br>oven                             | 1.00                                       | 8.75                                 |
|             | Mushroom                 | 25.00                          | 1.50                         | 0.75                                   | 0.75                              | 0.75                           | bake in<br>oven                             | 1.00                                       | 1.50                                 |
|             | Total                    |                                | 338.62                       | 292.70                                 | 290.28                            | 292.70                         |                                             |                                            | 338.62                               |
| Hachee      | Hachee<br>meat           | 100.00                         | 5.00                         | 13.00                                  | 4.00                              | 14.00                          | fry in pan<br>and stew                      | 1.00 * 1.00                                | 5.00                                 |
|             | Onion                    | 100.00                         | 29.00                        | 23.00                                  | 23.00                             | 23.00                          | fry in pan<br>and stew                      | 1.00 * 1.00                                | 29.00                                |
|             | Vinegar                  | 4.50                           | 0.14                         | 1.22                                   | 0.72                              | 1.35                           | stew                                        | 1.00                                       | 0.14                                 |
|             | Flour                    | 7.50                           | 0.75                         | 1.13                                   | 1.20                              | 1.13                           | stew                                        | 1.00                                       | 0.75                                 |
|             | Pepper                   | 1.25                           | 5.46                         | 5.54                                   | 5.30                              | 5.54                           | stew                                        | 1.00                                       | 5.46                                 |
|             | Butter                   | 12.50                          | 2.13                         | 3.00                                   | 1.60                              | 3.00                           | stew                                        | 1.00                                       | 2.13                                 |
|             | Laurel                   | 1.25                           | 0.00                         | 10.43                                  | 0.00                              | 10.43                          | stew                                        | 1.00                                       | 0.00                                 |
|             | Cloves                   | 1.25                           | 8.08                         | 7.90                                   | 9.10                              | 8.08                           | stew                                        | 1.00                                       | 8.08                                 |
|             | Bouillon<br>powder       | 1.25                           | 0.00                         | 0.75                                   | 2.80                              | 0.09                           | stew                                        | 1.00                                       | 0.00                                 |
|             | Total                    |                                | 50.55                        | 65.95                                  | 47.72                             | 66.60                          |                                             |                                            | 50.55                                |

Table S5. Vitamin C calculation for three recipes

|           |                   | Raw weight in recipe (g) | VC mg in recipe(NEVO) | VC mg in recipe (Mynetdiary) | VC mg in recipe (Calories!) | VC mg in recipe(Virtue) | First and second cooking procedure | First and second retention factor | VC mg in one portion (NEVO) |
|-----------|-------------------|--------------------------|-----------------------|------------------------------|-----------------------------|-------------------------|------------------------------------|-----------------------------------|-----------------------------|
| stamp pot | kale              | 250.00                   | 250.00                | 299.00                       | 252.50                      | 300.00                  | stew                               | 0.60                              | 150.00                      |
|           | potatoes          | 312.50                   | 43.75                 | 28.30                        | 50.00                       | 61.50                   | stew                               | 0.85                              | 37.19                       |
|           | butter            | 10.00                    | 0.00                  | 0.00                         | 0.00                        | 0.00                    |                                    | -                                 | 0.00                        |
|           | semi-skimmed milk | 18.80                    | 0.19                  | 0.00                         | 0.00                        | 0.00                    | boil                               | 0.70                              | 0.13                        |
|           | Total             |                          | 293.94                | 327.30                       | 302.50                      | 361.50                  |                                    |                                   | 187.19                      |
|           |                   |                          |                       |                              |                             |                         |                                    |                                   |                             |
| Pizza     | Flour             | 50.00                    | 0.00                  | 0.00                         | 0.00                        | 0.00                    | bake in oven                       | 0.70                              | 0.00                        |
|           | Olive oil         | 4.50                     | 0.00                  | 0.00                         | 0.00                        | 0.00                    | bake in oven                       | -                                 | 0.00                        |
|           | Tomato puree      | 11.25                    | 1.46                  | 1.24                         | 4.19                        | 1.19                    | bake in oven                       | 0.80                              | 1.17                        |
|           | Yeast             | 0.88                     | 0.00                  | 0.00                         | 0.00                        | 0.00                    | bake in oven                       | -                                 | 0.00                        |
|           | Oregano           | 0.38                     | 0.00                  | 0.00                         | 0.00                        | 0.01                    | bake in oven                       | -                                 | 0.00                        |
|           | Mature cheese 48+ | 37.50                    | 0.00                  | 0.00                         | 0.00                        | 0.00                    | bake in oven                       | 0.70                              | 0.00                        |
|           | Tomato            | 25.00                    | 3.75                  | 3.50                         | 3.43                        | 3.43                    | bake in oven                       | 0.80                              | 3.00                        |
|           | Salami            | 25.00                    | 0.00                  | 0.00                         | 0.00                        | 0.00                    | bake in oven                       | 0.80                              | 0.00                        |
|           | Mushroom          | 25.00                    | 1.00                  | 0.53                         | 0.53                        | 0.53                    | bake in oven                       | 0.80                              | 0.80                        |
|           | Total             |                          | 6.21                  | 5.26                         | 8.14                        | 5.15                    |                                    |                                   | 4.97                        |
| Hachee    | Hachee meat       | 100.00                   | 0.00                  | 0.00                         | 0.00                        | 0.00                    | fry in pan and stew                | 0.75 * 2                          | 0.00                        |
|           | Onion             | 100.00                   | 5.00                  | 7.40                         | 7.40                        | 7.40                    | fry in pan and stew                | 0.85 * 2                          | 3.61                        |
|           | Vinegar           | 4.50                     | 0.00                  | 0.00                         | 0.00                        | 0.00                    | stew                               | 1.00                              | 0.00                        |
|           | Flour             | 7.50                     | 0.00                  | 0.00                         | 0.00                        | 0.00                    | stew                               | 1.00                              | 0.00                        |
|           | Pepper            | 1.25                     | 0.00                  | 0.00                         | 0.00                        | 0.00                    | stew                               | 1.00                              | 0.00                        |
|           | Butter            | 12.50                    | 0.00                  | 0.00                         | 0.03                        | 0.03                    | stew                               | 1.00                              | 0.00                        |
|           | Laurel            | 1.25                     | 0.00                  | 0.58                         | 0.00                        | 0.58                    | stew                               | 1.00                              | 0.00                        |
|           | Cloves            | 1.25                     | 1.01                  | 0.00                         | 0.00                        | 1.01                    | stew                               | 1.00                              | 1.01                        |
|           | Bouillon powder   | 1.25                     | 0.00                  | 0.00                         | 0.00                        | 0.01                    | stew                               | 1.00                              | 0.00                        |
|           | Total             |                          | 6.01                  | 7.98                         | 7.43                        | 9.02                    |                                    |                                   | 4.63                        |

Table S6. Vitamin A calculation for three recipes

|             |                   |                          |                        |                              |                             |                          |                                    |                                   |                             |
|-------------|-------------------|--------------------------|------------------------|------------------------------|-----------------------------|--------------------------|------------------------------------|-----------------------------------|-----------------------------|
| stamp<br>ot |                   | Raw weight in recipe (g) | VA ug in recipe (NEVO) | VA ug in recipe (Mynetdiary) | VA ug in recipe (Calories!) | VA ug in recipe (Virtue) | First and second cooking procedure | First and second retention factor | VA ug in one portion (NEVO) |
|             | kale              | 250.00                   | 1677.50                | 2475.00                      | 2250.00                     | 0.00                     | stew                               | 0.90                              | 1509.75                     |
|             | potatoes          | 312.50                   | 3.13                   | 7.50                         | 0.00                        | 0.00                     | stew                               | 0.90                              | 2.81                        |
|             | butter            | 10.00                    | 90.50                  | 74.97                        | 70.00                       | 73.80                    |                                    | -                                 | 90.50                       |
|             | semi-skimmed milk | 18.80                    | 3.20                   | 0.00                         | 0.00                        | 0.00                     | boil                               | 1.00                              | 3.20                        |
|             | Total             |                          | 1774.32                | 2557.47                      | 2320.00                     | 73.80                    |                                    |                                   | 1606.26                     |
| Pizza       | Flour             | 50.00                    | 0.00                   | 0.35                         | 0.00                        | 0.00                     | bake in oven                       | 0.90                              | 0.00                        |
|             | Olive oil         | 4.50                     | 0.18                   | 0.00                         | 8.24                        | 0.00                     | bake in oven                       | 1.00                              | 0.18                        |
|             | Tomato puree      | 11.25                    | 31.16                  | 19.13                        | 22.50                       | 0.00                     | bake in oven                       | 0.90                              | 28.05                       |
|             | Yeast             | 0.88                     | 0.00                   | 0.00                         | 0.00                        | 0.00                     | bake in oven                       | -                                 | 0.00                        |
|             | Oregano           | 0.38                     | 2.59                   | 2.13                         | 0.00                        | 0.00                     | bake in oven                       | -                                 | 2.59                        |
|             | Mature cheese 48+ | 37.50                    | 129.38                 | 125.25                       | 136.13                      | 96.75                    | bake in oven                       | 1.00                              | 129.38                      |
|             | Tomato            | 25.00                    | 19.25                  | 58.25                        | 37.48                       | 0.00                     | bake in oven                       | 0.90                              | 17.33                       |
|             | Salami            | 25.00                    | 5.25                   | 0.00                         | 0.00                        | 0.00                     | bake in oven                       | 1.00                              | 5.25                        |
|             | Mushroom          | 25.00                    | 0.00                   | 0.00                         | 0.00                        | 0.00                     | bake in oven                       | 1.00                              | 0.00                        |
|             | Total             |                          | 187.81                 | 205.10                       | 204.34                      | 96.75                    |                                    |                                   | 182.76                      |
| Hachee      | Hachee meat       | 100.00                   | 20.00                  | 1.98                         | 34.80                       | 2.20                     | fry in pan and stew                | 0.80 * 0.90                       | 12.80                       |
|             | Onion             | 100.00                   | 0.00                   | 0.66                         | 0.40                        | 0.00                     | fry in pan and stew                | 0.80 * 0.90                       | 0.00                        |
|             | Vinegar           | 4.50                     | 0.00                   | 0.00                         | 0.00                        | 0.00                     | stew                               | 1.00                              | 0.00                        |
|             | Flour             | 7.50                     | 0.00                   | 0.00                         | 0.00                        | 0.00                     | stew                               | 1.00                              | 0.00                        |
|             | Pepper            | 1.25                     | 2.38                   | 2.26                         | 0.00                        | 0.00                     | stew                               | 1.00                              | 2.38                        |
|             | Butter            | 12.50                    | 113.13                 | 103.09                       | 87.50                       | 92.26                    | stew                               | 1.00                              | 113.13                      |
|             | Laurel            | 1.25                     | 0.00                   | 0.03                         | 0.00                        | 0.00                     | stew                               | 1.00                              | 0.00                        |
|             | Cloves            | 1.25                     | 0.63                   | 0.33                         | 0.70                        | 0.00                     | stew                               | 1.00                              | 0.63                        |
|             | Bouillon powder   | 1.25                     | 0.00                   | 0.00                         | 0.00                        | 0.00                     | stew                               | 1.00                              | 0.00                        |
|             | Total             |                          | 136.13                 | 108.34                       | 123.40                      | 94.46                    |                                    |                                   | 128.93                      |

Table S7. Vitamin B1 calculation for three recipes

| stamp<br>ot |                          | Raw<br>weight in<br>recipe (g) | VB1 mg in<br>recipe(NEV<br>O) | VB1 mg in<br>recipe<br>(Mynetdiar<br>y) | VB1 mg in<br>recipe<br>(Calories!) | VB1 mg in<br>recipe(Virt<br>ue) | First and<br>second<br>cooking<br>procedure | First and<br>second<br>retention<br>factor | VB1 mg in<br>one<br>portion<br>(NEVO) |
|-------------|--------------------------|--------------------------------|-------------------------------|-----------------------------------------|------------------------------------|---------------------------------|---------------------------------------------|--------------------------------------------|---------------------------------------|
|             | kale                     | 250.00                         | 0.50                          | 0.25                                    | 0.25                               | 0.28                            | stew                                        | 0.90                                       | 0.45                                  |
|             | potatoes                 | 312.50                         | 0.13                          | 0.06                                    | 0.31                               | 0.22                            | stew                                        | 0.90                                       | 0.11                                  |
|             | butter                   | 10.00                          | 0.00                          | 0.00                                    | 0.00                               | 0.00                            | boil                                        | 1.00                                       | 0.00                                  |
|             | semi-<br>skimmed<br>milk | 18.80                          | 0.03                          | 0.00                                    | 0.01                               | 0.00                            | boil                                        | 0.90                                       | 0.03                                  |
|             | Total                    |                                | 0.66                          | 0.32                                    | 0.57                               | 0.49                            |                                             |                                            | 0.60                                  |
| Pizza       | Flour                    | 50.00                          | 0.10                          | 0.40                                    | 0.05                               | 0.40                            | bake in<br>oven                             | 0.75                                       | 0.08                                  |
|             | Olive oil                | 4.50                           | 0.00                          | 0.00                                    | 0.00                               | 0.00                            | bake in<br>oven                             | -                                          | 0.00                                  |
|             | Tomato<br>puree          | 11.25                          | 0.02                          | 0.00                                    | 0.02                               | 0.00                            | bake in<br>oven                             | 0.90                                       | 0.02                                  |
|             | Yeast                    | 0.88                           | 0.02                          | 0.10                                    | 0.01                               | 0.10                            | bake in<br>oven                             | -                                          | 0.02                                  |
|             | Oregano                  | 0.38                           | 0.00                          | 0.00                                    | 0.00                               | 0.00                            | bake in<br>oven                             | -                                          | 0.00                                  |
|             | Mature<br>cheese 48+     | 37.50                          | 0.00                          | 0.00                                    | 0.01                               | 0.01                            | bake in<br>oven                             | 0.75                                       | 0.00                                  |
|             | Tomato                   | 25.00                          | 0.00                          | 0.00                                    | 0.01                               | 0.01                            | bake in<br>oven                             | 0.90                                       | 0.01                                  |
|             | Salami                   | 25.00                          | 0.05                          | 0.23                                    | 0.18                               | 0.23                            | bake in<br>oven                             | 0.90                                       | 0.04                                  |
|             | Mushroom                 | 25.00                          | 0.02                          | 0.03                                    | 0.02                               | 0.02                            | bake in<br>oven                             | 0.90                                       | 0.02                                  |
|             | Total                    |                                | 0.21                          | 0.75                                    | 0.29                               | 0.77                            |                                             |                                            | 0.18                                  |
| Hachee      | Hachee<br>meat           | 100.00                         | 0.05                          | 0.10                                    | 0.10                               | 0.08                            | fry in pan<br>and stew                      | 0.60 * 0.60                                | 0.02                                  |
|             | Onion                    | 100.00                         | 0.04                          | 0.00                                    | 0.05                               | 0.05                            | fry in pan<br>and stew                      | 0.90 * 0.90                                | 0.03                                  |
|             | Vinegar                  | 4.50                           | 0.00                          | -                                       | 0.00                               | 0.00                            | stew                                        | 1.00                                       | 0.00                                  |
|             | Flour                    | 7.50                           | 0.01                          | 0.08                                    | 0.01                               | 0.06                            | stew                                        | 0.75                                       | 0.00                                  |
|             | Pepper                   | 1.25                           | 0.00                          | 0.01                                    | 0.00                               | 0.00                            | stew                                        | 1.00                                       | 0.00                                  |
|             | Butter                   | 12.50                          | 0.00                          | 0.00                                    | 0.00                               | 0.00                            | stew                                        | 1.00                                       | 0.00                                  |
|             | Laurel                   | 1.25                           | 0.00                          | 0.00                                    | 0.00                               | 0.00                            | stew                                        | 1.00                                       | 0.00                                  |
|             | Cloves                   | 1.25                           | 0.00                          | 0.00                                    | 0.00                               | 0.00                            | stew                                        | 1.00                                       | 0.00                                  |
|             | Bouillon<br>powder       | 1.25                           | 0.00                          | 0.00                                    | 0.00                               | 0.00                            | stew                                        | 1.00                                       | 0.00                                  |
|             | Total                    |                                | 0.10                          | 0.19                                    | 0.16                               | 0.19                            |                                             |                                            | 0.06                                  |

Table S8. Vitamin B2 calculation for three recipes

| stamp<br>ot |                          | Raw<br>weight in<br>recipe (g) | VB2 mg in<br>recipe(NEV<br>O) | VB2 mg in<br>recipe<br>(Mynetdiar<br>y) | VB2 mg in<br>recipe<br>(Calories!) | VB2 mg in<br>recipe(Virt<br>ue) | First and<br>second<br>cooking<br>procedure | First and<br>second<br>retention<br>factor | VB2 mg in<br>one<br>portion<br>(NEVO) |
|-------------|--------------------------|--------------------------------|-------------------------------|-----------------------------------------|------------------------------------|---------------------------------|---------------------------------------------|--------------------------------------------|---------------------------------------|
|             | kale                     | 250.00                         | 0.05                          | 0.25                                    | 0.75                               | 0.33                            | stew                                        | 0.95                                       | 0.05                                  |
|             | potatoes                 | 312.50                         | 0.38                          | 0.31                                    | 0.00                               | 0.09                            | stew                                        | 0.95                                       | 0.36                                  |
|             | butter                   | 10.00                          | 0.00                          | 0.00                                    | 0.01                               | 0.00                            | boil                                        | 1.00                                       | 0.00                                  |
|             | semi-<br>skimmed<br>milk | 18.80                          | 0.01                          | 0.00                                    | 0.03                               | 0.06                            | boil                                        | 0.95                                       | 0.01                                  |
|             | Total                    |                                | 0.43                          | 0.56                                    | 0.79                               | 0.48                            |                                             |                                            | 0.41                                  |
| Pizza       | Flour                    | 50.00                          | 0.03                          | 0.25                                    | 0.05                               | 0.25                            | bake in<br>oven                             | 1.00                                       | 0.03                                  |
|             | Olive oil                | 4.50                           | 0.00                          | 0.00                                    | 0.00                               | 0.00                            | bake in<br>oven                             | -                                          | 0.00                                  |
|             | Tomato<br>puree          | 11.25                          | 0.01                          | 0.01                                    | 0.01                               | 0.01                            | bake in<br>oven                             | 0.95                                       | 0.01                                  |
|             | Yeast                    | 0.88                           | 0.04                          | 0.04                                    | 0.02                               | 0.04                            | bake in<br>oven                             | -                                          | 0.04                                  |
|             | Oregano                  | 0.38                           | 0.00                          | 0.00                                    | 0.00                               | 0.00                            | bake in<br>oven                             | -                                          | 0.00                                  |
|             | Mature<br>cheese 48+     | 37.50                          | 0.11                          | 0.15                                    | 0.15                               | 0.14                            | bake in<br>oven                             | 0.95                                       | 0.10                                  |
|             | Tomato                   | 25.00                          | 0.00                          | 0.00                                    | 0.00                               | 0.01                            | bake in<br>oven                             | 0.95                                       | 0.00                                  |
|             | Salami                   | 25.00                          | 0.05                          | 0.08                                    | 0.05                               | 0.08                            | bake in<br>oven                             | 1.00                                       | 0.05                                  |
|             | Mushroom                 | 25.00                          | 0.08                          | 0.10                                    | 0.10                               | 0.10                            | bake in<br>oven                             | 0.95                                       | 0.07                                  |
|             | Total                    |                                | 0.31                          | 0.62                                    | 0.38                               | 0.62                            |                                             |                                            | 0.30                                  |
| Hachee      | Hachee<br>meat           | 100.00                         | 0.16                          | 0.20                                    | 0.20                               | 0.17                            | fry in pan<br>and stew                      | 1.00 * 1.00                                | 0.16                                  |
|             | Onion                    | 100.00                         | 0.02                          | 0.00                                    | 0.03                               | 0.03                            | fry in pan<br>and stew                      | 0.95 * 0.95                                | 0.02                                  |
|             | Vinegar                  | 4.50                           | 0.00                          | -                                       | 0.00                               | 0.00                            | stew                                        | 1.00                                       | 0.00                                  |
|             | Flour                    | 7.50                           | 0.00                          | 0.00                                    | 0.00                               | 0.04                            | stew                                        | 1.00                                       | 0.00                                  |
|             | Pepper                   | 1.25                           | 0.00                          | 0.00                                    | 0.00                               | 0.00                            | stew                                        | 1.00                                       | 0.00                                  |
|             | Butter                   | 12.50                          | 0.00                          | 0.00                                    | 0.01                               | 0.00                            | stew                                        | 1.00                                       | 0.00                                  |
|             | Laurel                   | 1.25                           | 0.00                          | 0.01                                    | 0.00                               | 0.01                            | stew                                        | 1.00                                       | 0.00                                  |
|             | Cloves                   | 1.25                           | 0.00                          | 0.00                                    | 0.00                               | 0.00                            | stew                                        | 1.00                                       | 0.00                                  |
|             | Bouillon<br>powder       | 1.25                           | 0.00                          | 0.00                                    | 0.00                               | 0.00                            | stew                                        | 1.00                                       | 0.00                                  |
|             | Total                    |                                | 0.19                          | 0.21                                    | 0.24                               | 0.25                            |                                             |                                            | 0.19                                  |

Table S9. Vitamin B6 calculation for three recipes

| stamp<br>ot |                   | Raw weight in recipe (g) | VB6 mg in recipe(NEVO) | VB6 mg in recipe (Mynetdiary) | VB6 mg in recipe (Calories!) | VB6 mg in recipe(Virtue) | First and second cooking procedure | First and second retention factor | VB6 mg in one portion (NEVO) |
|-------------|-------------------|--------------------------|------------------------|-------------------------------|------------------------------|--------------------------|------------------------------------|-----------------------------------|------------------------------|
|             | kale              | 250.00                   | 0.55                   | 0.75                          | 0.75                         | 0.68                     | stew                               | 0.90                              | 0.50                         |
|             | potatoes          | 312.50                   | 0.94                   | 0.63                          | 0.94                         | 0.63                     | stew                               | 0.90                              | 0.84                         |
|             | butter            | 10.00                    | 0.00                   | 0.00                          | 0.00                         | 0.00                     | boil                               |                                   | 0.00                         |
|             | semi-skimmed milk | 18.80                    | 0.01                   | 0.00                          | 0.01                         | 0.00                     | boil                               | 0.80                              | 0.01                         |
|             | Total             |                          | 1.49                   | 1.38                          | 1.70                         | 1.30                     |                                    |                                   | 1.34                         |
| Pizza       | Flour             | 50.00                    | 0.13                   | 0.00                          | 0.05                         | 0.02                     | bake in oven                       | 0.90                              | 0.11                         |
|             | Olive oil         | 4.50                     | 0.00                   | 0.00                          | 0.00                         | 0.00                     | bake in oven                       | -                                 | 0.00                         |
|             | Tomato puree      | 11.25                    | 0.03                   | 0.01                          | 0.05                         | 0.01                     | bake in oven                       | 0.90                              | 0.03                         |
|             | Yeast             | 0.88                     | 0.02                   | 0.01                          | 0.01                         | 0.01                     | bake in oven                       | -                                 | 0.02                         |
|             | Oregano           | 0.38                     | 0.00                   | 0.00                          | 0.00                         | 0.00                     | bake in oven                       | -                                 | 0.00                         |
|             | Mature cheese 48+ | 37.50                    | 0.01                   | 0.04                          | 0.04                         | 0.03                     | bake in oven                       | 0.75                              | 0.01                         |
|             | Tomato            | 25.00                    | 0.02                   | 0.03                          | 0.02                         | 0.02                     | bake in oven                       | 0.90                              | 0.02                         |
|             | Salami            | 25.00                    | 0.03                   | 0.15                          | 0.13                         | 0.14                     | bake in oven                       | 0.90                              | 0.02                         |
|             | Mushroom          | 25.00                    | 0.03                   | 0.03                          | 0.03                         | 0.03                     | bake in oven                       | 0.90                              | 0.03                         |
|             | Total             |                          | 0.26                   | 0.27                          | 0.31                         | 0.26                     |                                    |                                   | 0.24                         |
| Hachee      | Hachee meat       | 100.00                   | 0.26                   | 0.60                          | 0.20                         | 0.57                     | fry in pan and stew                | 0.60 * 0.60                       | 0.09                         |
|             | Onion             | 100.00                   | 0.12                   | 0.10                          | 0.12                         | 0.12                     | fry in pan and stew                | 0.90 * 0.90                       | 0.10                         |
|             | Vinegar           | 4.50                     | 0.00                   | -                             | 0.00                         | 0.00                     | stew                               | 1.00                              | 0.00                         |
|             | Flour             | 7.50                     | 0.01                   | 0.00                          | 0.02                         | 0.00                     | stew                               | 0.80                              | 0.01                         |
|             | Pepper            | 1.25                     | 0.00                   | 0.00                          | 0.00                         | 0.00                     | stew                               | 1.00                              | 0.00                         |
|             | Butter            | 12.50                    | 0.00                   | 0.00                          | 0.00                         | 0.00                     | stew                               | 1.00                              | 0.00                         |
|             | Laurel            | 1.25                     | 0.00                   | 0.02                          | 0.00                         | 0.02                     | stew                               | 1.00                              | 0.00                         |
|             | Cloves            | 1.25                     | 0.00                   | 0.01                          | 0.00                         | 0.01                     | stew                               | 1.00                              | 0.00                         |
|             | Bouillon powder   | 1.25                     | 0.00                   | 0.00                          | 0.00                         | 0.00                     | stew                               | 1.00                              | 0.00                         |
|             | Total             |                          | 0.39                   | 0.73                          | 0.34                         | 0.73                     |                                    |                                   | 0.20                         |

Table S10. Vitamin B12 calculation for three recipes

|             |                   |                          |                         |                                |                               |                           |                                    |                                   |                               |
|-------------|-------------------|--------------------------|-------------------------|--------------------------------|-------------------------------|---------------------------|------------------------------------|-----------------------------------|-------------------------------|
| stamp<br>ot |                   | Raw weight in recipe (g) | VB12 ug in recipe(NEVO) | VB12 ug in recipe (Mynetdiary) | VB12 ug in recipe (Calories!) | VB12 ug in recipe(Virtue) | First and second cooking procedure | First and second retention factor | VB12 ug in one portion (NEVO) |
|             | kale              | 250.00                   | 0.00                    | 0.00                           | -                             | 0.00                      | stew                               | -                                 | 0.00                          |
|             | potatoes          | 312.50                   | 0.00                    | 0.00                           | -                             | 0.00                      | stew                               | -                                 | 0.00                          |
|             | butter            | 10.00                    | 0.03                    | 0.02                           | -                             | 0.02                      |                                    | 1.00                              | 0.03                          |
|             | semi-skimmed milk | 18.80                    | 0.08                    | 0.41                           | -                             | 0.17                      | boil                               | 0.90                              | 0.08                          |
|             | Total             |                          | 0.11                    | 0.43                           | -                             | 0.19                      |                                    |                                   | 0.11                          |
| Pizza       | Flour             | 50.00                    | 0.00                    | 0.00                           | -                             | 0.00                      | bake in oven                       | 1.00                              | 0.00                          |
|             | Olive oil         | 4.50                     | 0.00                    | 0.00                           | -                             | 0.00                      | bake in oven                       | -                                 | 0.00                          |
|             | Tomato puree      | 11.25                    | 0.00                    | 0.00                           | -                             | 0.00                      | bake in oven                       | 0.70                              | 0.00                          |
|             | Yeast             | 0.88                     | 0.00                    | 0.00                           | -                             | 0.00                      | bake in oven                       | -                                 | 0.00                          |
|             | Oregano           | 0.38                     | 0.00                    | 0.00                           | -                             | 0.00                      | bake in oven                       | -                                 | 0.00                          |
|             | Mature cheese 48+ | 37.50                    | 0.75                    | 0.30                           | -                             | 0.31                      | bake in oven                       | 0.90                              | 0.68                          |
|             | Tomato            | 25.00                    | 0.00                    | 0.00                           | -                             | 0.00                      | bake in oven                       | 0.70                              | 0.00                          |
|             | Salami            | 25.00                    | 0.35                    | 0.70                           | -                             | 0.70                      | bake in oven                       | 0.95                              | 0.33                          |
|             | Mushroom          | 25.00                    | 0.00                    | 0.00                           | -                             | 0.01                      | bake in oven                       | 0.70                              | 0.00                          |
|             | Total             |                          | 1.10                    | 1.00                           | -                             | 1.02                      |                                    |                                   | 1.01                          |
| Hachee      | Hachee meat       | 100.00                   | 2.91                    | 2.53                           | -                             | 2.66                      | fry in pan and stew                | 0.70 * 0.70                       | 1.43                          |
|             | Onion             | 100.00                   | 0.00                    | 0.00                           | -                             | 0.00                      | fry in pan and stew                | 0.70 * 0.70                       | 0.00                          |
|             | Vinegar           | 4.50                     | -                       | 0.00                           | -                             | 0.00                      | stew                               | 1.00                              | 0.00                          |
|             | Flour             | 7.50                     | 0.00                    | 0.00                           | -                             | 0.00                      | stew                               | 0.95                              | 0.00                          |
|             | Pepper            | 1.25                     | 0.00                    | 0.00                           | -                             | 0.00                      | stew                               | 1.00                              | 0.00                          |
|             | Butter            | 12.50                    | 0.04                    | 0.03                           | -                             | 0.02                      | stew                               | 1.00                              | 0.04                          |
|             | Laurel            | 1.25                     | 0.00                    | 0.00                           | -                             | 0.00                      | stew                               | 1.00                              | 0.00                          |
|             | Cloves            | 1.25                     | 0.00                    | 0.00                           | -                             | 0.00                      | stew                               | 1.00                              | 0.00                          |
|             | Bouillon powder   | 1.25                     | 0.00                    | 0.14                           | -                             | 0.00                      | stew                               | 1.00                              | 0.00                          |
|             | Total             |                          | 2.95                    | 2.70                           | -                             | 2.69                      |                                    |                                   | 1.46                          |

Table S11. Folate calculation for three recipes

|             |                   |                          |                            |                                  |                                 |                              |                                    |                                   |                                 |
|-------------|-------------------|--------------------------|----------------------------|----------------------------------|---------------------------------|------------------------------|------------------------------------|-----------------------------------|---------------------------------|
| stamp<br>ot |                   | Raw weight in recipe (g) | Folate ug in recipe (NEVO) | Folate ug in recipe (Mynetdiary) | Folate ug in recipe (Calories!) | Folate ug in recipe (Virtue) | First and second cooking procedure | First and second retention factor | Folate ug in one portion (NEVO) |
|             | kale              | 250.00                   | 125.00                     | 350.00                           | 0.00                            | 0.00                         | stew                               | 0.70                              | 87.50                           |
|             | potatoes          | 312.50                   | 71.88                      | 56.25                            | 93.75                           | 0.00                         | stew                               | 0.75                              | 53.91                           |
|             | butter            | 10.00                    | 0.00                       | 0.30                             | 0.30                            | 0.00                         |                                    | -                                 | 0.00                            |
|             | semi-skimmed milk | 18.80                    | 1.22                       | 0.00                             | 0.00                            | 0.00                         | boil                               | 0.50                              | 0.61                            |
|             | Total             |                          | 198.10                     | 406.55                           | 94.05                           | 0.00                         |                                    |                                   | 142.02                          |
| Pizza       | Flour             | 50.00                    | 27.00                      | 91.50                            | 8.00                            | 77.00                        | bake in oven                       | 0.50                              | 13.50                           |
|             | Olive oil         | 4.50                     | 0.00                       | 0.00                             | 0.00                            | 0.00                         | bake in oven                       | -                                 | 0.00                            |
|             | Tomato puree      | 11.25                    | 4.64                       | 1.24                             | 3.68                            | 0.00                         | bake in oven                       | 0.70                              | 3.24                            |
|             | Yeast             | 0.88                     | 35.00                      | 20.48                            | 8.22                            | 0.00                         | bake in oven                       | -                                 | 35.00                           |
|             | Oregano           | 0.38                     | 0.00                       | 0.89                             | 0.00                            | 0.00                         | bake in oven                       | -                                 | 0.00                            |
|             | Mature cheese 48+ | 37.50                    | 9.38                       | 6.75                             | 12.38                           | 0.00                         | bake in oven                       | 0.50                              | 4.69                            |
|             | Tomato            | 25.00                    | 3.93                       | 3.75                             | 9.75                            | 0.00                         | bake in oven                       | 0.70                              | 2.75                            |
|             | Salami            | 25.00                    | 0.63                       | 0.50                             | 0.50                            | 0.00                         | bake in oven                       | 0.80                              | 0.50                            |
|             | Mushroom          | 25.00                    | 11.00                      | 4.25                             | 2.00                            | 0.00                         | bake in oven                       | 0.70                              | 7.70                            |
|             | Total             |                          | 91.56                      | 129.35                           | 44.52                           | 77.00                        |                                    |                                   | 67.38                           |
| Hachee      | Hachee meat       | 100.00                   | 2.90                       | 3.30                             | 13.00                           | 0.00                         | fry in pan and stew                | 0.80 * 0.80                       | 1.86                            |
|             | Onion             | 100.00                   | 23.70                      | 20.90                            | 14.60                           | 0.00                         | fry in pan and stew                | 0.70 * 0.70                       | 11.61                           |
|             | Vinegar           | 4.50                     | 0.00                       | 0.00                             | 0.00                            | 0.00                         | stew                               | 1.00                              | 0.00                            |
|             | Flour             | 7.50                     | 1.43                       | 28.60                            | 0.80                            | 12.71                        | stew                               | 0.80                              | 1.14                            |
|             | Pepper            | 1.25                     | 0.00                       | 0.23                             | 0.00                            | 0.00                         | stew                               | 1.00                              | 0.00                            |
|             | Butter            | 12.50                    | 0.00                       | 0.41                             | 0.40                            | 0.00                         | stew                               | 1.00                              | 0.00                            |
|             | Laurel            | 1.25                     | 0.00                       | 2.48                             | 0.00                            | 0.00                         | stew                               | 1.00                              | 0.00                            |
|             | Cloves            | 1.25                     | 0.00                       | 0.34                             | 0.00                            | 0.00                         | stew                               | 1.00                              | 0.00                            |
|             | Bouillon powder   | 1.25                     | 0.00                       | 0.44                             | 0.00                            | 0.00                         | stew                               | 1.00                              | 0.00                            |
|             | Total             |                          | 28.03                      | 56.70                            | 28.80                           | 12.71                        |                                    |                                   | 14.61                           |
